# Supplementary material for: Burn Eschar Stimulates Fibroblast and Adipose Mesenchymal Stromal Cell Proliferation and Migration but Inhibits Endothelial Cell Sprouting
Source: MDPI journal article supplement (doi:10.3390/ijms18081790), 2017-08-18
Supplement: s1 [file s1]

# Supplementary File

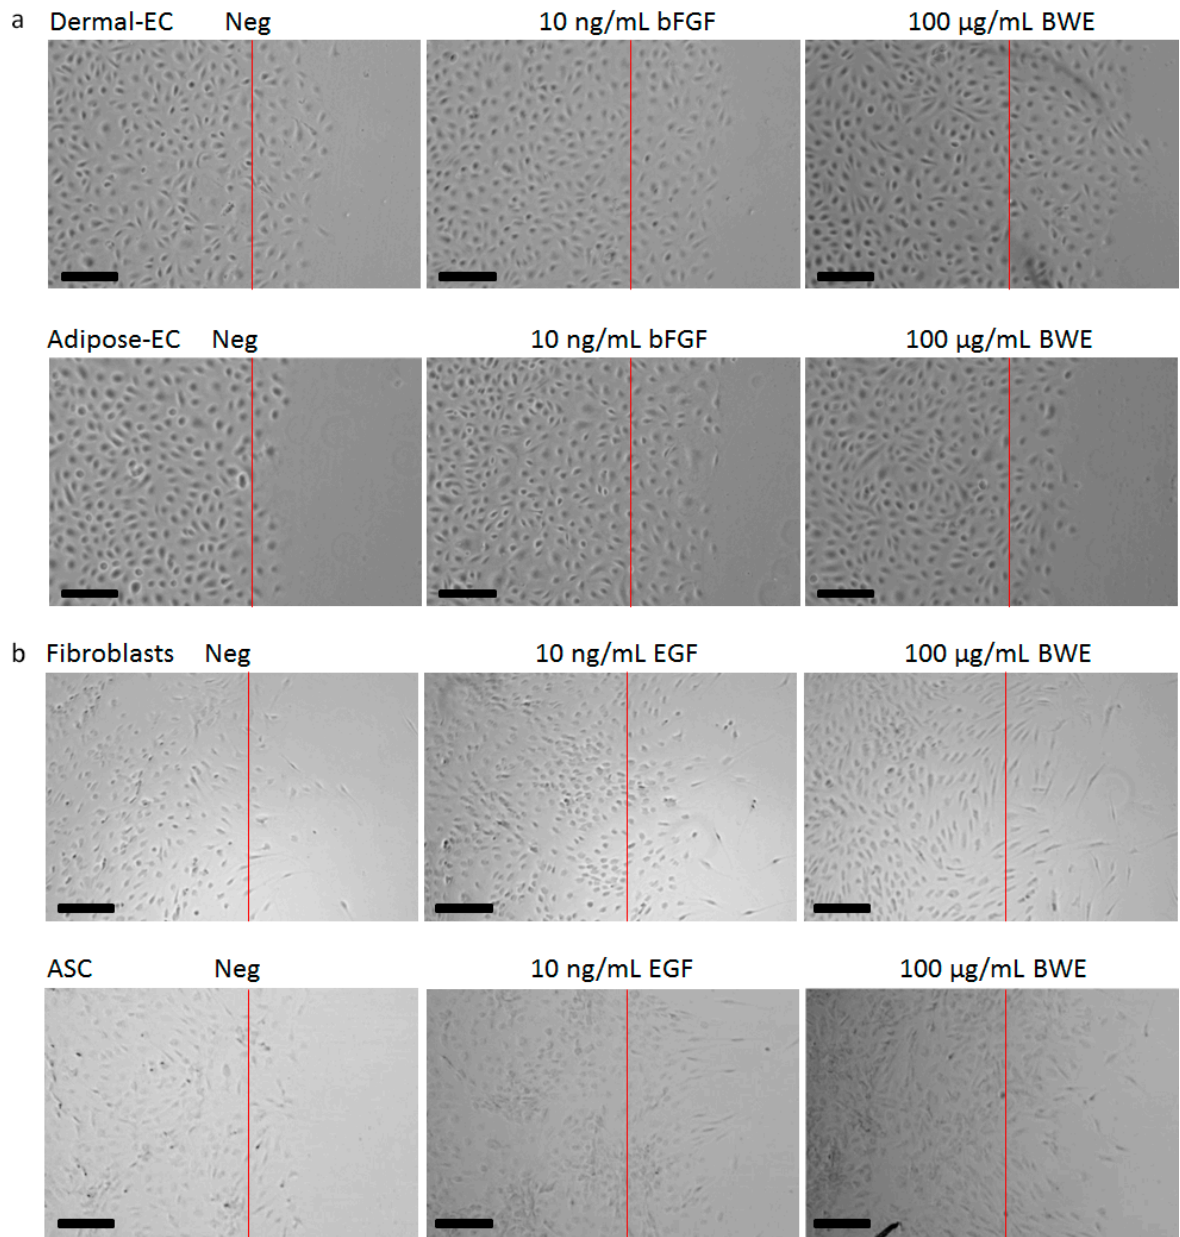

**Figure S1.** Morphology of dermal- and adipose-endothelial cells, fibroblasts and ASC after exposure to BWE. (a) Photographs of migration scratch assay with dermal- and adipose-EC cultured in the presence of 0 (Neg), 10 ng/mL bFGF or 100 µg/mL BWE at t=16 h. (b) Photographs of migration scratch assay with fibroblasts and ASC cultured in the presence of 0 (Neg), 10 ng/mL bFGF or 100 µg/mL BWE at t=72 h. Red line indicates the border of the original scratch at t=0 h. Scale bar = 200 µm.
